# Supplementary material
Source: MDPI journal article supplement (https://www.mdpi.com/2308-3417/1/1/5)
Supplement: s1 [file s1]

# – SAFE –

## Safety Advice For Elderly drivers

Name: \_\_\_\_\_ Date of birth: \_\_\_\_\_ Sex:  f  m

Active driver?  yes  no      If not, why? \_\_\_\_\_

| Risk factor                                                                                                                                                                                                                   | Risk level            |                       |                          |                          |                          |
|-------------------------------------------------------------------------------------------------------------------------------------------------------------------------------------------------------------------------------|-----------------------|-----------------------|--------------------------|--------------------------|--------------------------|
|                                                                                                                                                                                                                               | unclear               | no risk               | low                      | medium                   | high                     |
| <b>1 Accident history</b>                                                                                                                                                                                                     |                       |                       |                          |                          |                          |
| 1.1 Accidents/traffic offences/police controls due to driving behavior (last 2 years)                                                                                                                                         | <input type="radio"/> | <input type="radio"/> | <input type="checkbox"/> | <input type="radio"/>    | <input type="checkbox"/> |
| 1.2 Passenger feels unsafe                                                                                                                                                                                                    | <input type="radio"/> | <input type="radio"/> | <input type="checkbox"/> | <input type="radio"/>    | <input type="checkbox"/> |
| 1.3 Avoidance behavior (e.g. driver does not drive during darkness anymore)                                                                                                                                                   | <input type="radio"/> | <input type="radio"/> | <input type="checkbox"/> | <input type="radio"/>    | <input type="checkbox"/> |
| <b>2 Activities of daily living</b>                                                                                                                                                                                           |                       |                       |                          |                          |                          |
| 2.1 Impairment BADL                                                                                                                                                                                                           | <input type="radio"/> | <input type="radio"/> | <input type="checkbox"/> | <input type="checkbox"/> | <input type="radio"/>    |
| <b>3 Vision</b>                                                                                                                                                                                                               |                       |                       |                          |                          |                          |
| 3.1 Visual acuity (eye chart < 60 %)                                                                                                                                                                                          | <input type="radio"/> | <input type="radio"/> | <input type="checkbox"/> | <input type="checkbox"/> | <input type="radio"/>    |
| 3.2 Field of view < 140 degrees/double vision/neglect                                                                                                                                                                         | <input type="radio"/> | <input type="radio"/> | <input type="checkbox"/> | <input type="checkbox"/> | <input type="radio"/>    |
| <b>4 Cervical spine mobility</b>                                                                                                                                                                                              |                       |                       |                          |                          |                          |
| 4.1 Limited head rotation, but > 45 degrees                                                                                                                                                                                   | <input type="radio"/> | <input type="radio"/> | <input type="radio"/>    | <input type="checkbox"/> | <input type="checkbox"/> |
| 4.2 Head rotation < 45 degrees                                                                                                                                                                                                | <input type="radio"/> | <input type="radio"/> | <input type="checkbox"/> | <input type="checkbox"/> | <input type="radio"/>    |
| <b>5 Diseases, symptoms, medication</b>                                                                                                                                                                                       |                       |                       |                          |                          |                          |
| 5.1 Parkinson's disease                                                                                                                                                                                                       | <input type="radio"/> | <input type="radio"/> | <input type="checkbox"/> | <input type="radio"/>    | <input type="checkbox"/> |
| 5.2 Epilepsy (asymptomatic < 12 months and/or syncope < 6 months)                                                                                                                                                             | <input type="radio"/> | <input type="radio"/> | <input type="checkbox"/> | <input type="checkbox"/> | <input type="radio"/>    |
| 5.3 Stroke (hemorrhage or ischemia) < 6 months                                                                                                                                                                                | <input type="radio"/> | <input type="radio"/> | <input type="checkbox"/> | <input type="checkbox"/> | <input type="radio"/>    |
| 5.4 Diabetes Mellitus including hypoglycemia and/or relevant somatic impairments                                                                                                                                              | <input type="radio"/> | <input type="radio"/> | <input type="checkbox"/> | <input type="radio"/>    | <input type="checkbox"/> |
| 5.5 Addiction (alcohol/benzodiazepine)                                                                                                                                                                                        | <input type="radio"/> | <input type="radio"/> | <input type="checkbox"/> | <input type="checkbox"/> | <input type="radio"/>    |
| 5.6 Psychotropic substances, sedative (long-term therapy)                                                                                                                                                                     | <input type="radio"/> | <input type="radio"/> | <input type="checkbox"/> | <input type="radio"/>    | <input type="checkbox"/> |
| 5.7 Psychotropic substances (uptitration phase)                                                                                                                                                                               | <input type="radio"/> | <input type="radio"/> | <input type="checkbox"/> | <input type="checkbox"/> | <input type="radio"/>    |
| 5.8 Impulsive/aggressive behavior                                                                                                                                                                                             | <input type="radio"/> | <input type="radio"/> | <input type="checkbox"/> | <input type="checkbox"/> | <input type="radio"/>    |
| 5.9 Daytime sleepiness (ESS)                                                                                                                                                                                                  | <input type="radio"/> | <input type="radio"/> | <input type="checkbox"/> | <input type="checkbox"/> | <input type="radio"/>    |
| <b>6 Global cognitive functioning</b>                                                                                                                                                                                         |                       |                       |                          |                          |                          |
| 6.1 MMSE: 25-28 points                                                                                                                                                                                                        | <input type="radio"/> | <input type="radio"/> | <input type="radio"/>    | <input type="checkbox"/> | <input type="checkbox"/> |
| 6.2 MMSE: 22-24 points                                                                                                                                                                                                        | <input type="radio"/> | <input type="radio"/> | <input type="checkbox"/> | <input type="radio"/>    | <input type="checkbox"/> |
| 6.3 MMSE: < 22 points                                                                                                                                                                                                         | <input type="radio"/> | <input type="radio"/> | <input type="checkbox"/> | <input type="checkbox"/> | <input type="radio"/>    |
| <b>7 Cognitive flexibility</b>                                                                                                                                                                                                |                       |                       |                          |                          |                          |
| 7.1 Trail Making Test B: 120-139 seconds                                                                                                                                                                                      | <input type="radio"/> | <input type="radio"/> | <input type="radio"/>    | <input type="checkbox"/> | <input type="checkbox"/> |
| 7.2 Trail Making Test B: 140-180 seconds                                                                                                                                                                                      | <input type="radio"/> | <input type="radio"/> | <input type="checkbox"/> | <input type="radio"/>    | <input type="checkbox"/> |
| 7.1 Trail Making Test B: > 180 seconds or cannot be completed                                                                                                                                                                 | <input type="radio"/> | <input type="radio"/> | <input type="checkbox"/> | <input type="checkbox"/> | <input type="radio"/>    |
| <b>8 Dementia etiology and severity</b>                                                                                                                                                                                       |                       |                       |                          |                          |                          |
| 8.1 Mild Alzheimer's dementia (MMSE > 24 points, TMT B < 140 seconds)                                                                                                                                                         | <input type="radio"/> | <input type="radio"/> | <input type="radio"/>    | <input type="checkbox"/> | <input type="checkbox"/> |
| 8.2 Frontotemporal dementia                                                                                                                                                                                                   | <input type="radio"/> | <input type="radio"/> | <input type="checkbox"/> | <input type="checkbox"/> | <input type="radio"/>    |
| 8.3 Dementia with Lewy bodies                                                                                                                                                                                                 | <input type="radio"/> | <input type="radio"/> | <input type="checkbox"/> | <input type="checkbox"/> | <input type="radio"/>    |
| 8.4 Parkinson's dementia                                                                                                                                                                                                      | <input type="radio"/> | <input type="radio"/> | <input type="checkbox"/> | <input type="checkbox"/> | <input type="radio"/>    |
| <b>9 Other risk factors</b>                                                                                                                                                                                                   |                       |                       |                          |                          |                          |
| 9.1 Anosognosia/thought disorder/right-left disorientation etc.                                                                                                                                                               | <input type="radio"/> | <input type="radio"/> | <input type="checkbox"/> | <input type="checkbox"/> | <input type="radio"/>    |
| <b>Total risk estimation for driving safety</b>                                                                                                                                                                               |                       |                       |                          |                          |                          |
| low                                                                                                                                                                                                                           | medium <sup>1</sup>   | high <sup>2</sup>     | very high <sup>3</sup>   | unclear                  |                          |
| <input type="radio"/>                                                                                                                                                                                                         | <input type="radio"/> | <input type="radio"/> | <input type="radio"/>    | <input type="radio"/>    |                          |
| <small>Interpretation guidelines: <sup>1</sup>maximal 2 low risk factors or 1 medium risk factor, <sup>2</sup>more than 2 low risk factors or more than 1 medium risk factor, <sup>3</sup>at least 1 high risk factor</small> |                       |                       |                          |                          |                          |
| <small>EvKB, Department of Geriatric Psychiatry</small>                                                                                                                                                                       |                       |                       |                          |                          |                          |
