# Supplementary material
Source: MDPI journal article supplement (https://www.mdpi.com/2308-3417/1/1/5)
Supplement: s1 [file s1]

Seniorenberatung Aufgrund Fahreignungsrelevanter Einschränkungen

Name: \_\_\_\_\_ Geb.-Dat.: \_\_\_\_\_ Geschlecht: ☐ w ☐ m

Motorisierte Teilnahme am StV? ☐ ja ☐ nein Wenn nein, warum nicht? \_\_\_\_\_

| Risikofaktor                                                                                                                                                                                                      | Risikolevel           |                       |                                  |                                  |                                  |
|-------------------------------------------------------------------------------------------------------------------------------------------------------------------------------------------------------------------|-----------------------|-----------------------|----------------------------------|----------------------------------|----------------------------------|
|                                                                                                                                                                                                                   | unklar                | kein Risiko           | niedrig                          | mittel                           | hoch                             |
| 1 Fahranamnese                                                                                                                                                                                                    |                       |                       |                                  |                                  |                                  |
| 1.1 Unfälle/Verkehrsdelikte/Polizeikontrollen wg. auffälliger Fahrweise (letzte 2 Jahre)                                                                                                                          | <input type="radio"/> | <input type="radio"/> | <input checked="" type="radio"/> | <input type="radio"/>            | <input checked="" type="radio"/> |
| 1.2 Beifahrer fühlt sich unsicher                                                                                                                                                                                 | <input type="radio"/> | <input type="radio"/> | <input checked="" type="radio"/> | <input type="radio"/>            | <input checked="" type="radio"/> |
| 1.3 Vermeidungsstrategien (z.B. Fahrer fährt nicht mehr bei Dunkelheit etc.)                                                                                                                                      | <input type="radio"/> | <input type="radio"/> | <input checked="" type="radio"/> | <input type="radio"/>            | <input checked="" type="radio"/> |
| 2 Alltagsaktivitäten                                                                                                                                                                                              |                       |                       |                                  |                                  |                                  |
| 2.1 Beeinträchtigung BADL                                                                                                                                                                                         | <input type="radio"/> | <input type="radio"/> | <input checked="" type="radio"/> | <input checked="" type="radio"/> | <input type="radio"/>            |
| 3 Sehen                                                                                                                                                                                                           |                       |                       |                                  |                                  |                                  |
| 3.1 Sehschärfe (Sehtafel < 60 %)                                                                                                                                                                                  | <input type="radio"/> | <input type="radio"/> | <input checked="" type="radio"/> | <input checked="" type="radio"/> | <input type="radio"/>            |
| 3.2 Gesichtsfeld < 140 Grad/Doppelbilder/Halbseitenneglect                                                                                                                                                        | <input type="radio"/> | <input type="radio"/> | <input checked="" type="radio"/> | <input checked="" type="radio"/> | <input type="radio"/>            |
| 4 HWS-Beweglichkeit                                                                                                                                                                                               |                       |                       |                                  |                                  |                                  |
| 4.1 Kopfdrehen eingeschränkt, aber > 45 Grad                                                                                                                                                                      | <input type="radio"/> | <input type="radio"/> | <input type="radio"/>            | <input checked="" type="radio"/> | <input checked="" type="radio"/> |
| 4.2 Kopfdrehen < 45 Grad                                                                                                                                                                                          | <input type="radio"/> | <input type="radio"/> | <input checked="" type="radio"/> | <input checked="" type="radio"/> | <input type="radio"/>            |
| 5 Erkrankungen, Symptome und Medikamente                                                                                                                                                                          |                       |                       |                                  |                                  |                                  |
| 5.1 Morbus Parkinson                                                                                                                                                                                              | <input type="radio"/> | <input type="radio"/> | <input checked="" type="radio"/> | <input type="radio"/>            | <input checked="" type="radio"/> |
| 5.2 Epilepsie (asymptomatisch < 12 Monate und/oder Synkope < 6 Monate)                                                                                                                                            | <input type="radio"/> | <input type="radio"/> | <input checked="" type="radio"/> | <input checked="" type="radio"/> | <input type="radio"/>            |
| 5.3 Schlaganfall (Blutung oder Ischämie) < 6 Monate                                                                                                                                                               | <input type="radio"/> | <input type="radio"/> | <input checked="" type="radio"/> | <input checked="" type="radio"/> | <input type="radio"/>            |
| 5.4 Diabetes Mellitus mit Hypoglykämie(n) und/oder relevanten körperl. Spätfolgen                                                                                                                                 | <input type="radio"/> | <input type="radio"/> | <input checked="" type="radio"/> | <input type="radio"/>            | <input checked="" type="radio"/> |
| 5.5 Hinweise auf Suchterkrankung (Alkohol/Benzodiazepine)                                                                                                                                                         | <input type="radio"/> | <input type="radio"/> | <input checked="" type="radio"/> | <input checked="" type="radio"/> | <input type="radio"/>            |
| 5.6 Psychotrope Substanzen, sedierend (Dauertherapie)                                                                                                                                                             | <input type="radio"/> | <input type="radio"/> | <input checked="" type="radio"/> | <input type="radio"/>            | <input checked="" type="radio"/> |
| 5.7 Psychotrope Substanzen (Eindosierungsphase)                                                                                                                                                                   | <input type="radio"/> | <input type="radio"/> | <input checked="" type="radio"/> | <input checked="" type="radio"/> | <input type="radio"/>            |
| 5.8 Deutlich impulsives/aggressives Verhalten                                                                                                                                                                     | <input type="radio"/> | <input type="radio"/> | <input checked="" type="radio"/> | <input checked="" type="radio"/> | <input type="radio"/>            |
| 5.9 Tagesschläfrigkeit (ESS)                                                                                                                                                                                      | <input type="radio"/> | <input type="radio"/> | <input checked="" type="radio"/> | <input checked="" type="radio"/> | <input type="radio"/>            |
| 6 Globales kognitives Leistungsniveau                                                                                                                                                                             |                       |                       |                                  |                                  |                                  |
| 6.1 MMST: 25-28 Punkte                                                                                                                                                                                            | <input type="radio"/> | <input type="radio"/> | <input type="radio"/>            | <input checked="" type="radio"/> | <input checked="" type="radio"/> |
| 6.2 MMST: 22-24 Punkte                                                                                                                                                                                            | <input type="radio"/> | <input type="radio"/> | <input checked="" type="radio"/> | <input type="radio"/>            | <input checked="" type="radio"/> |
| 6.3 MMST: < 22 Punkte                                                                                                                                                                                             | <input type="radio"/> | <input type="radio"/> | <input checked="" type="radio"/> | <input checked="" type="radio"/> | <input type="radio"/>            |
| 7 Kognitive Flexibilität                                                                                                                                                                                          |                       |                       |                                  |                                  |                                  |
| 7.1 Trail Making Test B: 120-139 Sekunden                                                                                                                                                                         | <input type="radio"/> | <input type="radio"/> | <input type="radio"/>            | <input checked="" type="radio"/> | <input checked="" type="radio"/> |
| 7.2 Trail Making Test B: 140-180 Sekunden                                                                                                                                                                         | <input type="radio"/> | <input type="radio"/> | <input checked="" type="radio"/> | <input type="radio"/>            | <input checked="" type="radio"/> |
| 7.1 Trail Making Test B: > 180 Sekunden oder nicht leistbar                                                                                                                                                       | <input type="radio"/> | <input type="radio"/> | <input checked="" type="radio"/> | <input checked="" type="radio"/> | <input type="radio"/>            |
| 8 Demenzätiologie und Schweregrad                                                                                                                                                                                 |                       |                       |                                  |                                  |                                  |
| 8.1 Leichte Alzheimer-Demenz (MMST > 24 Punkte, TMT B < 140 Sekunden)                                                                                                                                             | <input type="radio"/> | <input type="radio"/> | <input type="radio"/>            | <input checked="" type="radio"/> | <input checked="" type="radio"/> |
| 8.2 Frontotemporale Lobärdegeneration (Verhaltensvariante)                                                                                                                                                        | <input type="radio"/> | <input type="radio"/> | <input checked="" type="radio"/> | <input checked="" type="radio"/> | <input type="radio"/>            |
| 8.3 Lewy-Body-Demenz                                                                                                                                                                                              | <input type="radio"/> | <input type="radio"/> | <input checked="" type="radio"/> | <input checked="" type="radio"/> | <input type="radio"/>            |
| 8.4 Parkinson-Demenz                                                                                                                                                                                              | <input type="radio"/> | <input type="radio"/> | <input checked="" type="radio"/> | <input checked="" type="radio"/> | <input type="radio"/>            |
| 9 Sonstige Auffälligkeiten                                                                                                                                                                                        |                       |                       |                                  |                                  |                                  |
| 9.1 Fehlende Krankheitseinsicht/schwere formale Denkstörung/R-L-Schwäche etc.                                                                                                                                     | <input type="radio"/> | <input type="radio"/> | <input type="radio"/>            | <input type="radio"/>            | <input type="radio"/>            |
| Gesamteinschätzung des Risikos beim Führen eines Kraftfahrzeugs                                                                                                                                                   |                       |                       |                                  |                                  |                                  |
| niedrig                                                                                                                                                                                                           | mittel <sup>1</sup>   | hoch <sup>2</sup>     | sehr hoch <sup>3</sup>           | nicht beurteilbar                |                                  |
| <input type="radio"/>                                                                                                                                                                                             | <input type="radio"/> | <input type="radio"/> | <input type="radio"/>            | <input type="radio"/>            |                                  |
| Interpretationsrichtlinien: <sup>1</sup> maximal 2 niedrige oder 1 mittlerer Risikofaktor, <sup>2</sup> mehr als 2 niedrige oder mehr als 1 mittlerer Risikofaktor , <sup>3</sup> mindestens 1 hoher Risikofaktor |                       |                       |                                  |                                  |                                  |
| EvKB, Abteilung für Gerontopsychiatrie                                                                                                                                                                            |                       |                       |                                  |                                  |                                  |
